# Supplementary material for: Photocatalysis oxidative desulfurization of dibenzothiophene in extremely deep liquid fuels on the Z-scheme catalyst ZnO–CuInS 2 –ZnS intelligently integrated with carbon quantum dots: performance, mechanism, and stability
Source: Royal Society of Chemistry journal article supplement (doi:10.1039/d4ra04599h), 2024-01-01
Supplement: d4ra04599h1.pdf [file d4ra04599h1.pdf]

## Photocatalysis oxidative desulfurization of dibenzothiophene in extremely deep liquid fuels on the Z-scheme catalyst of ZnO-CuInS<sub>2</sub>-ZnS intelligently integrated with carbon quantum dots: Performance, mechanism, and stability†

Manh B. Nguyen

Institute of Chemistry, Vietnam Academy of Science and Technology, 18 Hoang Quoc Viet, Cau Giay, Hanoi, Viet Nam. Email: [nguyenbamanh@ich.vast.vn](mailto:nguyenbamanh@ich.vast.vn)

### Table S1. Characterization

The morphology of both ZnO, CuInS<sub>2</sub>, ZnS, ZCZ and ZCZ-CQD materials was examined by transmission electron microscopy (TEM) with an acceleration voltage of 200 kV (Leica IEO 906E). X-ray diffraction (XRD) analysis was conducted using a D8 Advance X-ray diffractometer (Bruker, Germany) equipped with a CuK $\alpha$  radiation source ( $2\theta$  range  $\sim 5\text{--}50^\circ$  and  $\lambda = 0.154\ 06$  nm). Elemental composition was determined by energy-dispersive X-ray spectroscopy (EDS) using a JEOL JED-2300 energy-dispersive spectrometer. The specific surface area was measured using a Tristar-3030 system (Micromeritics-USA) with N<sub>2</sub> adsorption at 77 K employing the Brunauer-Emmett-Teller (BET) method. X-ray photoelectron spectroscopy (XPS) was performed using a Thermo VG Multilab 2000 instrument. Photoluminescence (PL) and UV-vis diffuse reflectance spectroscopy (DRS) were recorded on a Cary Eclipse fluorescence spectrophotometer (Varian) and a UV-2600 spectrophotometer (Shimadzu), respectively.

Scavenging experiments of reaction radicals involve adding 2 mM of hydroxyl radical scavengers, p-benzoquinone (p-BQ), superoxide radical scavengers, ammonium oxalate monohydrate (AO) into the reaction system before light irradiation.

Table S1. Elemental composition (wt%) of ZnO, CuInS<sub>2</sub>, ZnS and ZCZ-CQD samples

| Materials          | Zn    | O     | Cu   | In    | S     | C   | N    | Total |
|--------------------|-------|-------|------|-------|-------|-----|------|-------|
| ZnO                | 76.52 | 23.48 | -    | -     | -     | -   | -    | 100   |
| CuInS <sub>2</sub> | -     | -     | 25.8 | 48.69 | 25.51 | -   | -    | 100   |
| ZnS                | 65.97 | -     | -    | -     | 34.03 | -   | -    | 100   |
| ZCZ-CQD            | 47.28 | 6.38  | 6.29 | 14.24 | 22.16 | 2.7 | 0.95 | 100   |

Table S2. Binding energies of the bonds in the ZnO, CuInS<sub>2</sub>, ZnS and ZCZ-CQD samples

| Materials |                      | ZnO     | CuInS <sub>2</sub> | ZnS     | ZCZ-CQD | ZCZ-CQD<br>after reaction |
|-----------|----------------------|---------|--------------------|---------|---------|---------------------------|
| Zn2p      | Zn 2p <sub>3/2</sub> | 1021.57 | -                  | 1021.64 | 1021.86 | 1021.99                   |
|           | Zn 2p <sub>1/2</sub> | 1044.66 | -                  | 1044.77 | 1044.94 | 1045.07                   |
|           | C=C/C-O              | -       | -                  | -       | 530.22  | 530.77                    |
| O1s       | Zn-O                 | 531.22  | -                  | -       | 531.57  | 531.96                    |
|           | -OH                  | 532.77  | -                  | -       | 532.36  | 533.00                    |
| S2p       | S2p <sub>3/2</sub>   | -       | 161.59             | 161.50  | 161.54  | 161.83                    |
|           | S2p <sub>1/2</sub>   | -       | 163.26             | 163.08  | 163.16  | 163.40                    |
|           | Cu <sup>+</sup>      | -       | 932.04             | -       | 931.56  | 931.75                    |
| Cu2p      |                      | -       | 951.81             | -       | 951.50  | 951.57                    |
|           | Cu <sup>2+</sup>     | -       | 933.17             | -       | 932.85  | 933.19                    |
|           |                      | -       | 953.19             | -       | 952.93  | 953.26                    |
|           | In <sup>2+</sup>     | -       | 444.95             | -       | 444.63  | 445.44                    |
| In3d      |                      | -       | 452.58             | -       | 452.22  | 453.01                    |
|           | In <sup>3+</sup>     | -       | 445.74             | -       | 445.37  | 445.90                    |
|           |                      | -       | 453.12             | -       | 452.86  | 453.47                    |
| C1s       | C-C/C=C              | -       | -                  | -       | 284.77  | 284.92                    |
|           | C-O                  | -       | -                  | -       | 286.31  | 286.44                    |
|           | C=O                  | -       | -                  | -       | 288.40  | 288.92                    |

Table 3. Comparison of different photocatalysts in the DBT degradation process

| Materials                                                         | Reaction conditions                                          | Light source           | Photocatalytic performance (%) | Time (min) | Ref.         |
|-------------------------------------------------------------------|--------------------------------------------------------------|------------------------|--------------------------------|------------|--------------|
| ZCZ-CQD                                                           | $m_{\text{catalyst}} = 1.5 \text{ g/L}$<br>[DBT] = 300 mg/L, | 300 W Xe lamp          | 98.32                          | 120        | This work    |
| $\alpha\text{-Fe}_2\text{O}_3/\text{g-C}_3\text{N}_4/\text{HNTs}$ | $m_{\text{catalyst}} = 2.5 \text{ g/L}$<br>[DBT] = 200 mg/L  | 300 W Xe lamp          | 96.01                          | 180        | <sup>1</sup> |
| AgCl/PbMoO <sub>4</sub>                                           | $m_{\text{catalyst}} = 1.5 \text{ g/L}$<br>[DBT] = 200 mg/L  | -                      | 97.0                           | 120        | <sup>2</sup> |
| Ag-AgBr/Al-MCM-41                                                 | $m_{\text{catalyst}} = 2.0 \text{ g/L}$<br>[DBT] = 500 mg/L, | 125 W high-pressure Hg | 98                             | 360        | <sup>3</sup> |
| Ni-WO <sub>3</sub> @g-C <sub>3</sub> N <sub>4</sub>               | $m_{\text{catalyst}} = 2.0 \text{ g/L}$<br>[DBT] = 100 mg/L  | -                      | 97.0                           | 180        | <sup>4</sup> |
| CeO <sub>2</sub> /ATP/g-C <sub>3</sub> N <sub>4</sub>             | [DBT] = 200 mg/L                                             | 300 W Xe lamp          | 98                             | 180        | <sup>5</sup> |

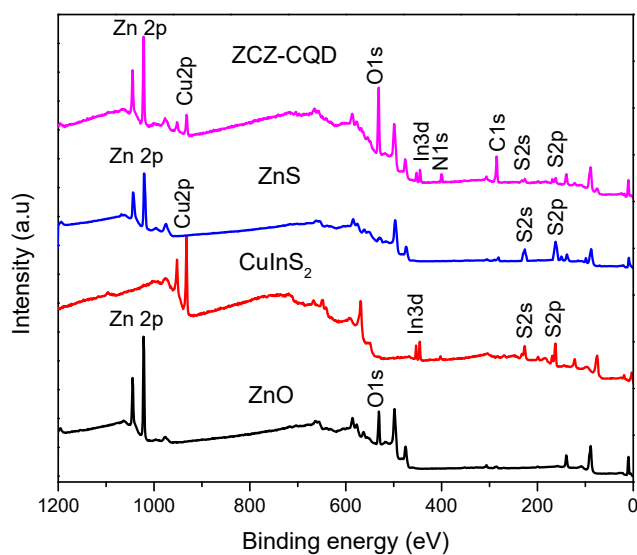

Figure S1. Full scan XPS spectra of ZnO, CuInS<sub>2</sub>, ZnS and ZCZ-CQD samples

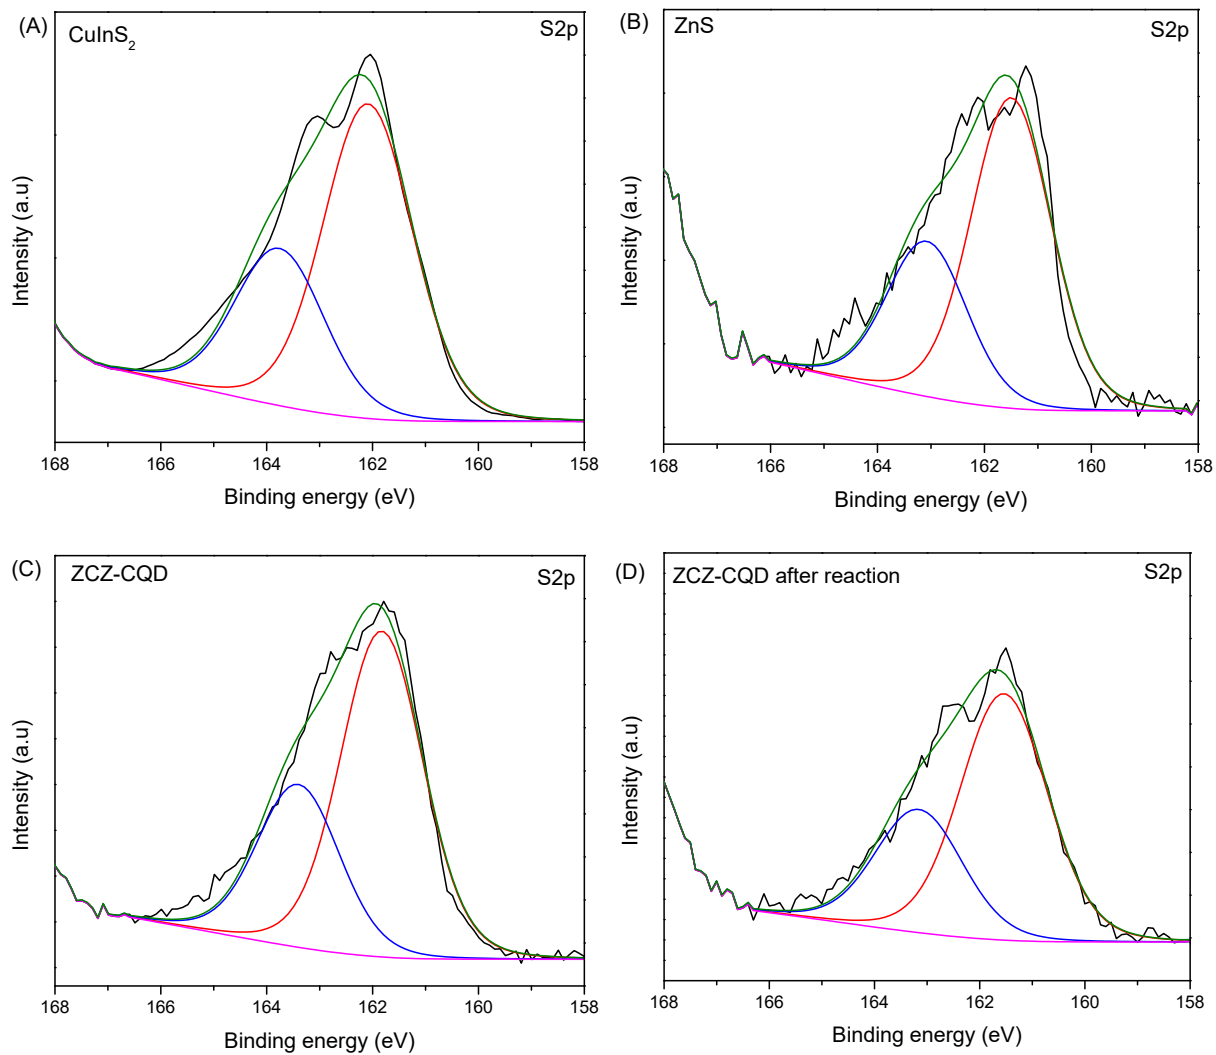

Figure S2. High-resolution S 2p XPS spectra of CuInS<sub>2</sub> (A) ZnS (B) and ZCZ-CQD (C) and CZC-CQD after 10 cycles (D)

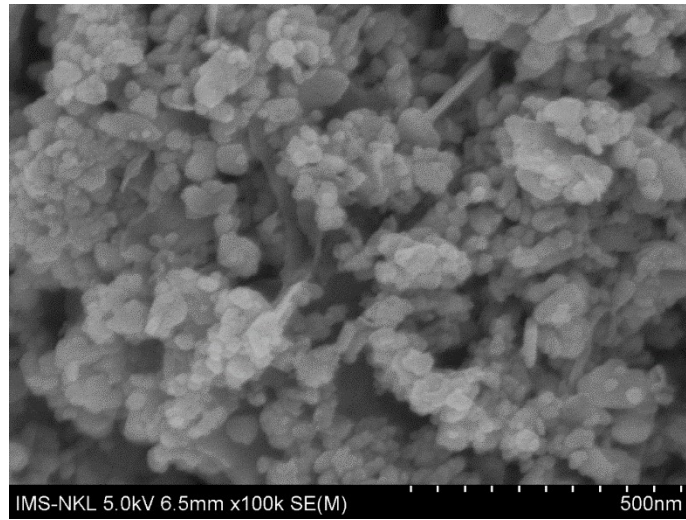

Figure S3. SEM image of ZCZ-CQD sample

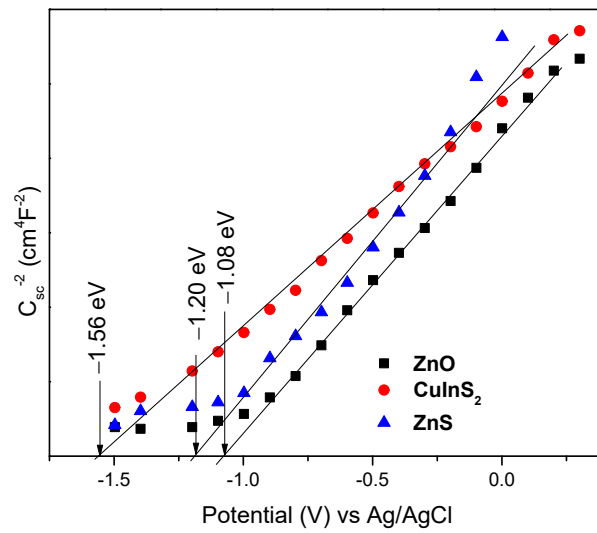

Figure S4. Mott-schotky plot of ZnO, CuInS<sub>2</sub> and ZnS samples

RT: 0.00 -40.00

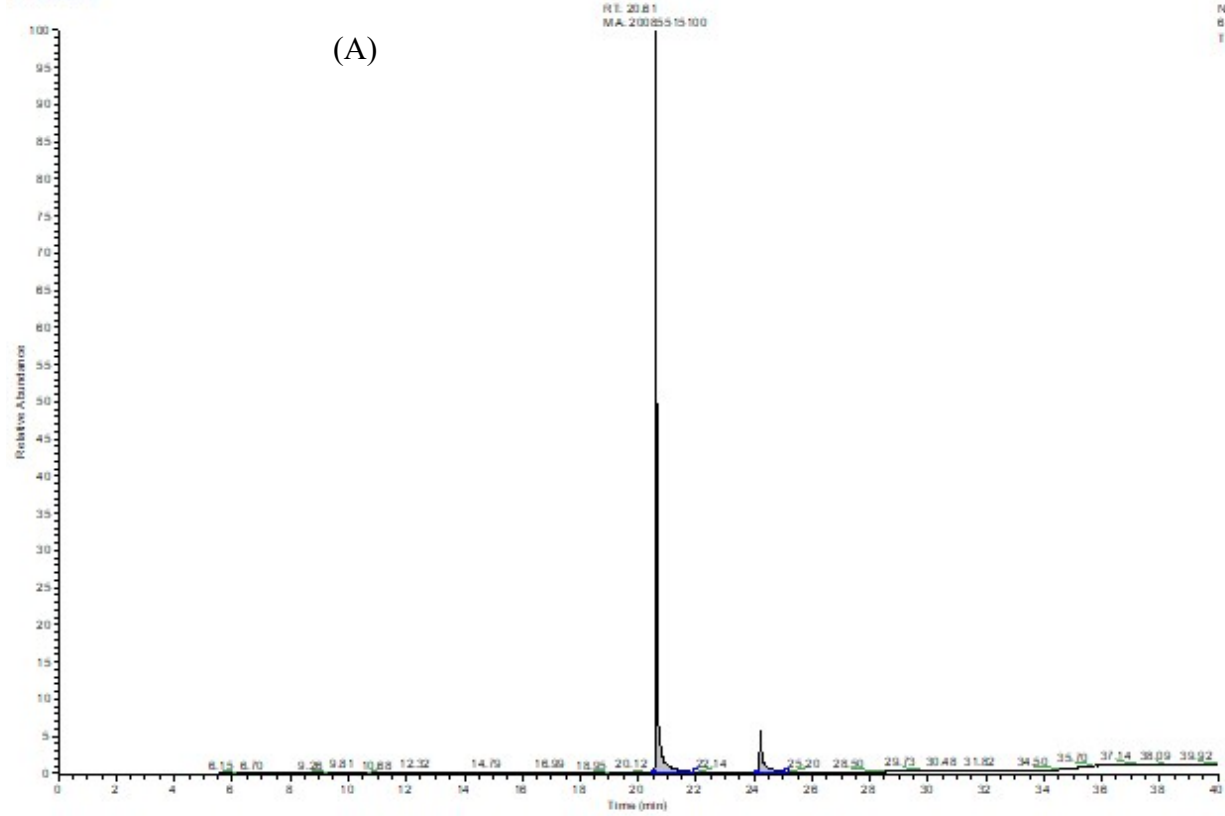

NL:  
6.75E9  
TIC MS 1

RT: 0.00 -40.00

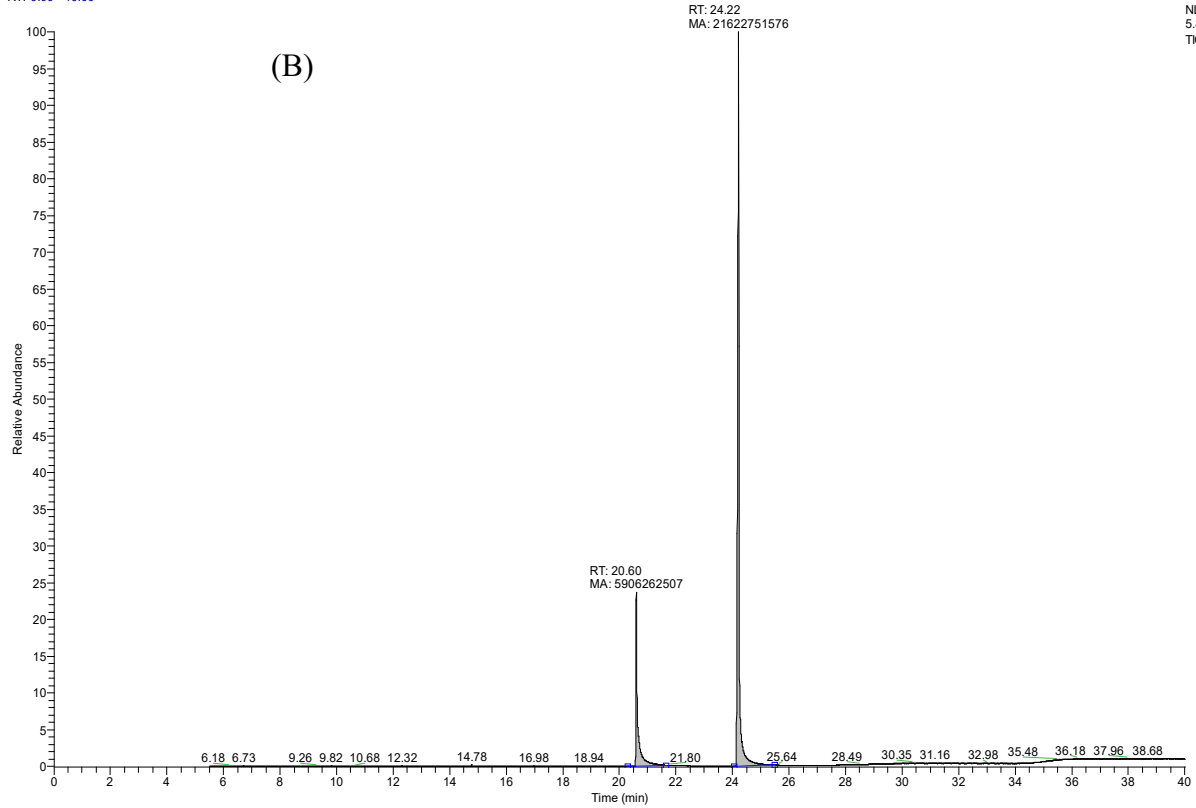

NL:  
5.88E9  
TIC MS 7

Figure S5. GC-MS of DBT (A) GC-MS spectra of the products in the desulfurization of DBT over ZCZ-CQD photocatalyst after 10 min

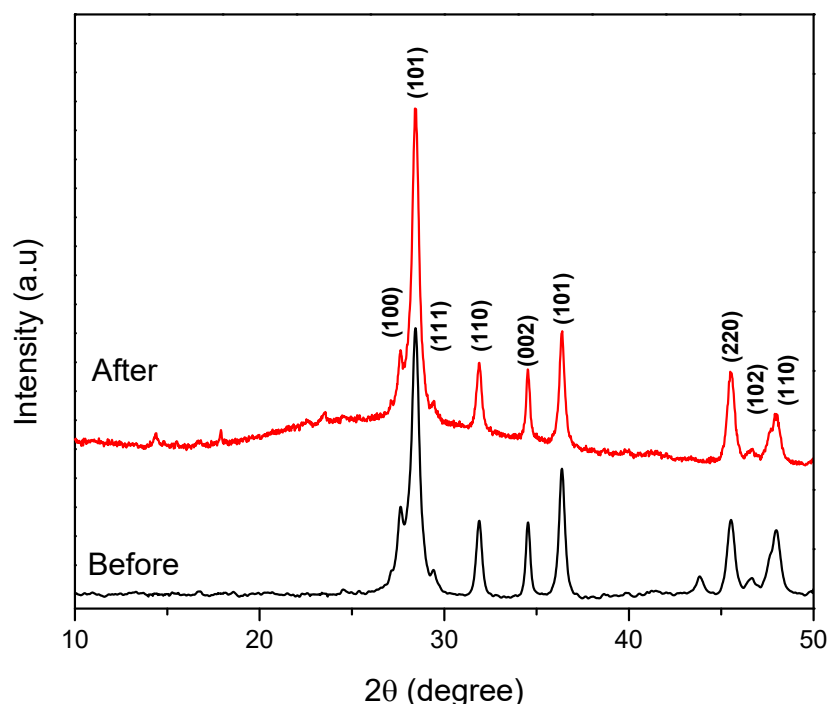

Figure S6. XRD patterns of ZCZ-CQD before and after 10 cycles reaction

## References

- (1) Zhou, X.; Liu, H.; Liu, S.; zhang, L.; Wang, T.; Wang, C.; Su, D. Constructing Efficient Cl-Fe<sub>2</sub>O<sub>3</sub>/g-C<sub>3</sub>N<sub>4</sub>/HNTs-Loaded Heterojunction Photocatalysts for Photocatalytic Oxidative Desulfurization: Influencing Factors, Kinetics, and Mechanism. *Fuel* **2023**, 332 (P1), 126147. <https://doi.org/10.1016/j.fuel.2022.126147>.
- (2) Chang, H.; Yi, H.; Ke, Q.; Zhang, J. Preparation of a AgCl/PbMoO<sub>4</sub> Composite and Investigation of Its Photocatalytic Oxidative Desulfurization Performance. *ACS Omega* **2020**, 5 (19), 10927–10938. <https://doi.org/10.1021/acsomega.0c00695>.
- (3) Pham, X. N.; Nguyen, B. M.; Thi, H. T.; Van Doan, H. Synthesis of Ag-AgBr/Al-MCM-41 Nanocomposite and Its Application in Photocatalytic Oxidative Desulfurization of Dibenzothiophene. *Advanced Powder Technology* **2018**. <https://doi.org/10.1016/j.appt.2018.04.019>.
- (4) Saeed, M.; Munir, M.; Intisar, A.; Waseem, A. Facile Synthesis of a Novel Ni-WO<sub>3</sub>@g-C<sub>3</sub>N<sub>4</sub>Nanocomposite for Efficient Oxidative Desulfurization of Both Model and Real Fuel. *ACS Omega* **2022**, 2. <https://doi.org/10.1021/acsomega.2c00886>.
- (5) Li, X.; Zhu, W.; Lu, X.; Zuo, S.; Yao, C.; Ni, C. Integrated Nanostructures of

CeO<sub>2</sub>/Attapulgite/g-C<sub>3</sub>N<sub>4</sub> as Efficient Catalyst for Photocatalytic Desulfurization: Mechanism, Kinetics and Influencing Factors. *Chemical Engineering Journal* **2017**, 326, 87–98. <https://doi.org/10.1016/j.cej.2017.05.131>.
